# Supplementary material
Source: Springer Nature journal article supplement (https://www.springermedizin.de/resource/supplementary/12905_2011_291_MOESM4_ESM.pdf/9518452)
Supplement: MOESM4 [file 9518452]

| Study                         | n  | Mean  | DNG  |    | GnRH analogue |      | MD   | 95% CI       |
|-------------------------------|----|-------|------|----|---------------|------|------|--------------|
|                               |    |       | SD   | n  | Mean          | SD   |      |              |
| Harada 2009 <sup>24</sup>     | 41 | -1.00 | 2.30 | 46 | -2.60         | 2.30 | 1.60 | [0.63; 2.57] |
| Strowitzki 2010 <sup>23</sup> | 21 | 0.25  | 2.77 | 29 | -4.04         | 4.84 | 4.29 | [2.17; 6.41] |

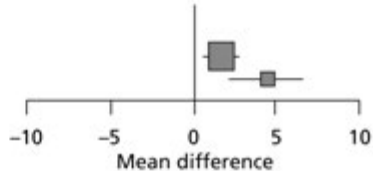

Favours GnRH analogue

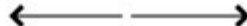

Favours DNG

*No combined estimate was calculated due to the heterogeneity of the studies*
